# Supplementary figures and images for: The Satellite DNAs Populating the Genome of Trigona hyalinata and the Sharing of a Highly Abundant satDNA in Trigona Genus
Source: MDPI journal article supplement (doi:10.3390/genes14020418), 2023-02-06

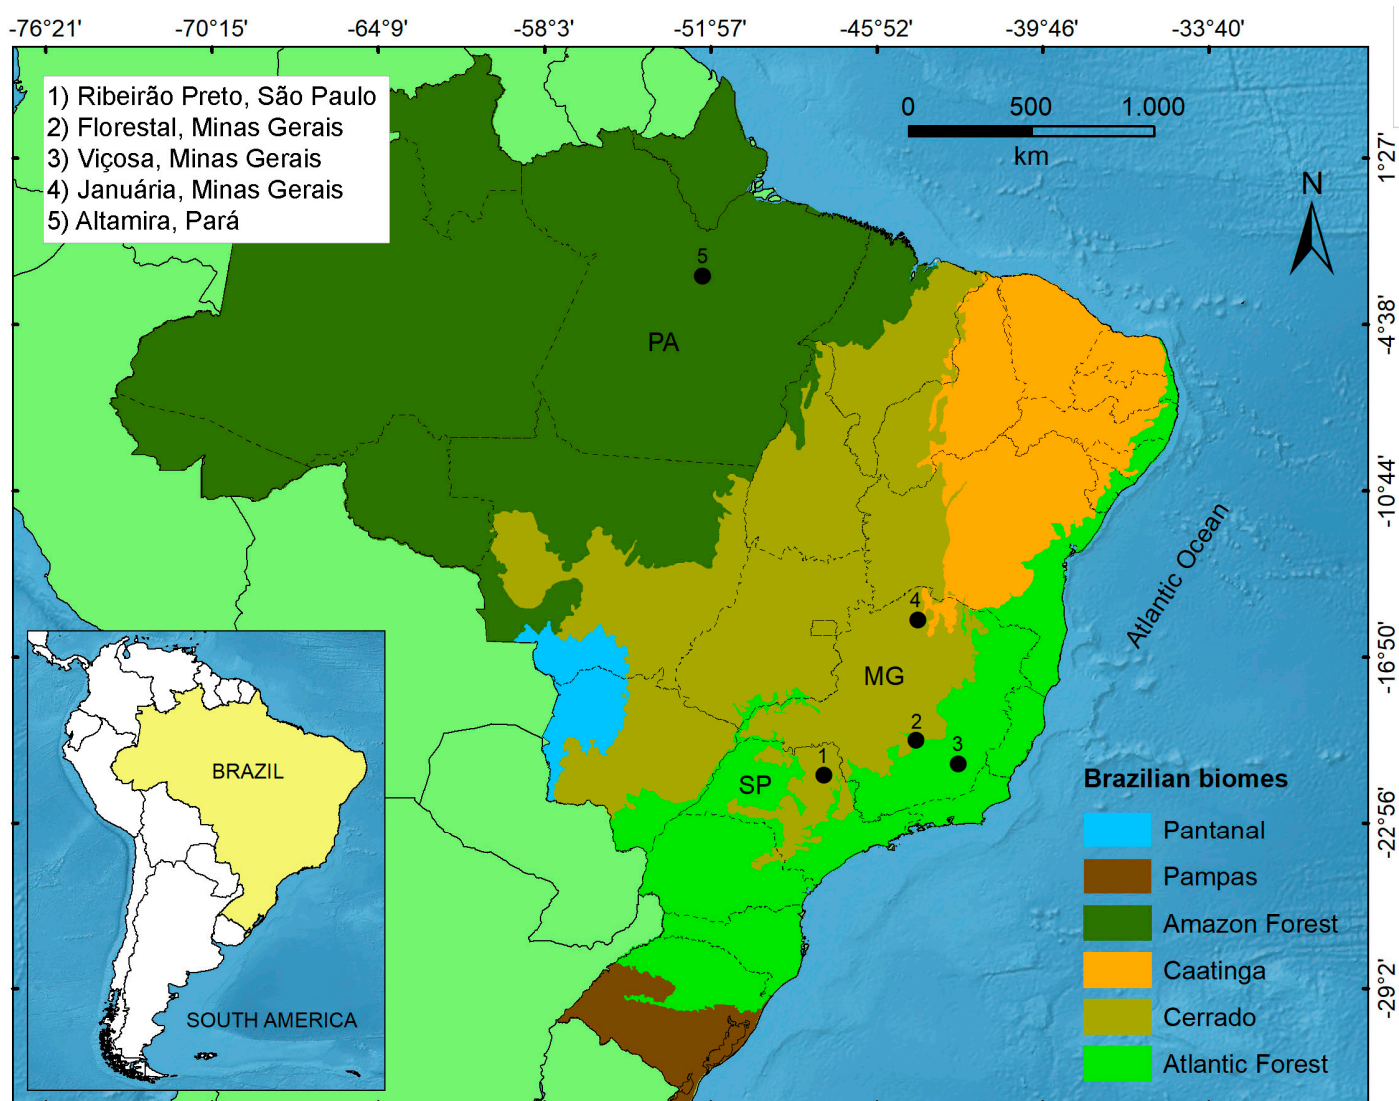

**Figure S1.** Map of Brazil showing the collection sites for the *Trigona* species used in this study.

Supplement: s1 [file s1]
